# Supplementary material for: One-step preparation of surface modified electrospun microfibers as suitable supports for protein immobilization
Source: Royal Society of Chemistry journal article supplement (doi:10.1039/c6py02086k), 2017-01-01
Supplement: c6py02086k1.pdf [file c6py02086k1.pdf]

## Electronic Supplementary Information

### One-step preparation of surface modified electrospun microfibers as suitable supports for protein immobilization

Guillaume Martrou,<sup>a,b</sup> Marc Léonetti,<sup>b</sup> Didier Gigmes<sup>a</sup> and Thomas Trimaille<sup>a,\*</sup>

<sup>1</sup> Aix Marseille Univ, CNRS, ICR, Marseille, France

<sup>2</sup> Aix Marseille Univ, CNRS, Centrale Marseille, IRPHE, Marseille, France

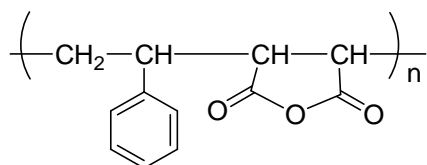

**Figure S1.** Chemical structure of poly(styrene-alt-maleic anhydride) (PSMA).

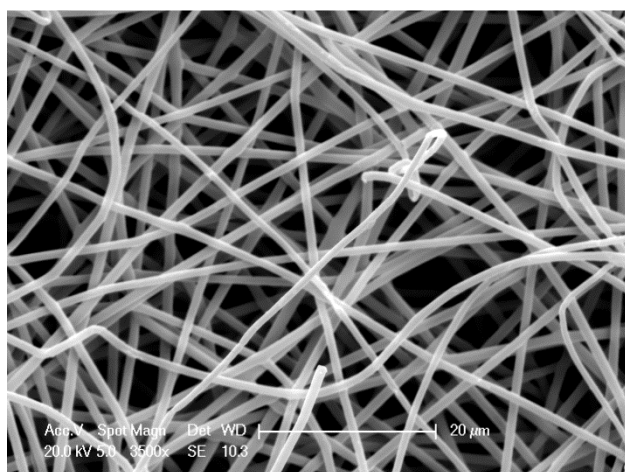

**Figure S2.** Scanning electron microscopy of the PSMA fibers obtained from conventional electrospinning.

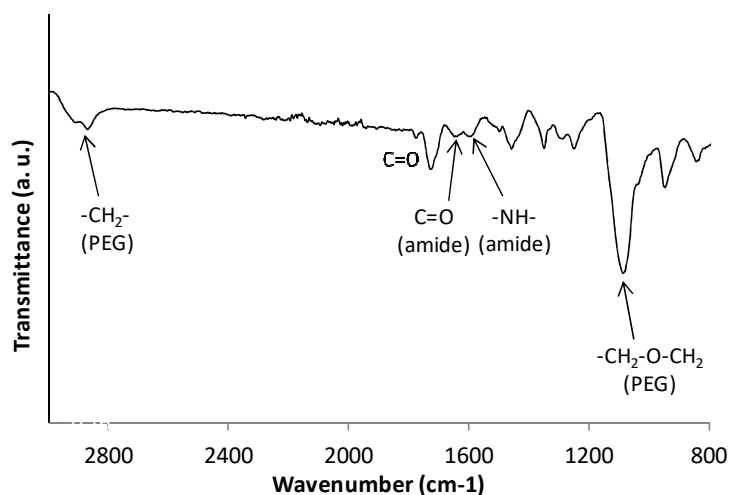

**Figure S3.** ATR-FTIR spectrum of PSMA-PEG fibers (prepared from  $1 \text{ mg}\cdot\text{mL}^{-1}$  PEG in PBS), to which spectrum of reference PSMA was subtracted.

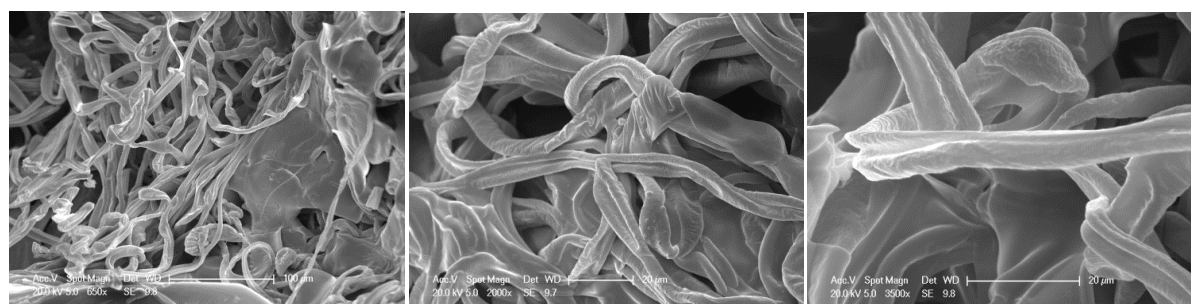

**Figure S4.** Scanning electron microscopy of the PSMA-hex-NH<sub>2</sub> fibers obtained from wet electrospinning.

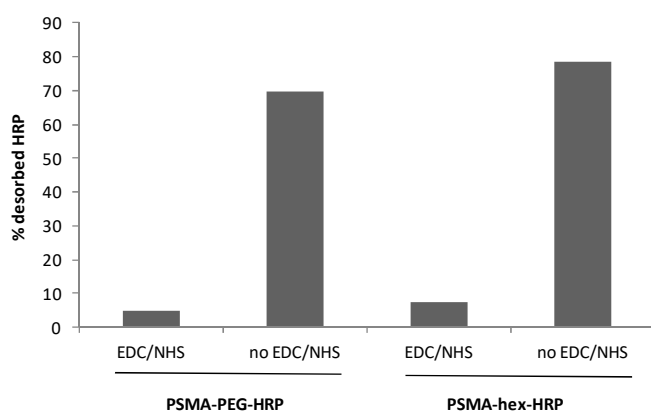

**Figure S5.** % of desorption of HRP enzyme from the PEG- and hexyl-functionalized fibers (prepared in absence or presence of EDC/NHS coupling agents), in SDS medium (5% in water).

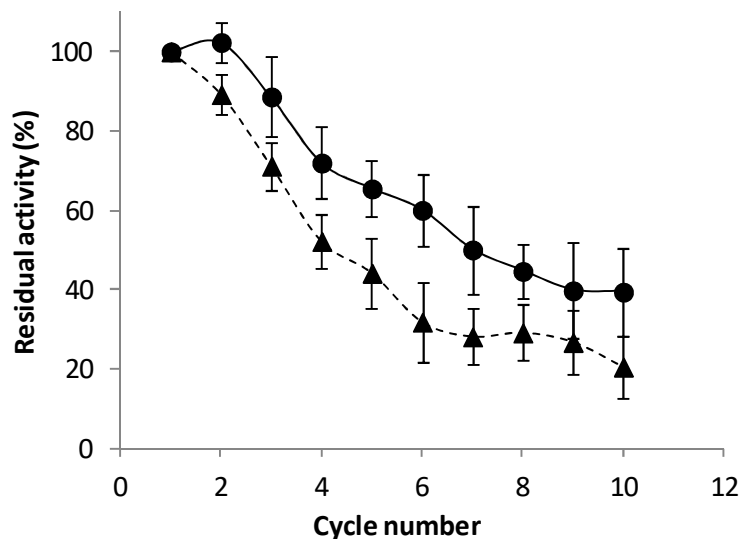

**Figure S6.** Reusability of the HRP enzyme immobilized on hexyl- (▲) and PEG- (●) functionalized fibers over 10 repeated cycles.

**Table S1.** Energy dispersive X-ray (EDX) analysis of the fibers.

| Element | Reference PSMA (PBS) |                   | PSMA-PEG-NH <sub>2</sub> |                   | PSMA-hex-NH <sub>2</sub> |                   |
|---------|----------------------|-------------------|--------------------------|-------------------|--------------------------|-------------------|
|         | Wt %                 | At %              | Wt %                     | At %              | Wt %                     | At %              |
| C       | 68.8±1.47            | <b>75.64±1.38</b> | 67.01±0.08               | <b>73.04±0.10</b> | 64.85±0.33               | <b>71.74±0.31</b> |
| N       | 1.42±0.26            | <b>1.34±0.24</b>  | 2.19±0.25                | <b>2.05±0.23</b>  | 2.56±0.11                | <b>2.43±0.10</b>  |
| O       | 23.94±1.71           | <b>19.77±1.47</b> | 29.64±0.13               | <b>24.26±0.1</b>  | 28.12±0.5                | <b>23.35±0.42</b> |
| Na      | 5.38±0.31            | <b>3.09±0.16</b>  | 1.16±0.03                | <b>0.66±0.02</b>  | 4.08±0.09                | <b>2.36±0.05</b>  |
